# Supplementary material for: Construction of core–shell magnetic metal–organic framework composites Fe3O4@MIL-101(Fe, Co) for degradation of RhB by efficiently activating PMS
Source: Royal Society of Chemistry journal article supplement (doi:10.1039/d3ra08768a), 2024-01-01
Supplement: d3ra08768a1.pdf [file d3ra08768a1.pdf]

## Supporting Information

### Construction of core-shell magnetic metal-organic framework composites

#### $\text{Fe}_3\text{O}_4@\text{MIL-101}(\text{Fe}, \text{Co})$ for degradation of RhB by efficiently activating PMS

Huizhong Wu<sup>#</sup>, Qiong Yi<sup>#</sup>, Xiang Li, Yingxi Wang\*, Ling Li\*

*Ministry-of-Education Key Laboratory for the Synthesis and Application of Organic Function Molecules, Hubei University 430062, People's Republic of China.*

\* Corresponding author

E-mail addresses: [lingli@hubu.edu.cn](mailto:lingli@hubu.edu.cn) (L. Li), [16890202@qq.com](mailto:16890202@qq.com) (Yingxi. Wang)

The Supporting Information included:

7 Figures

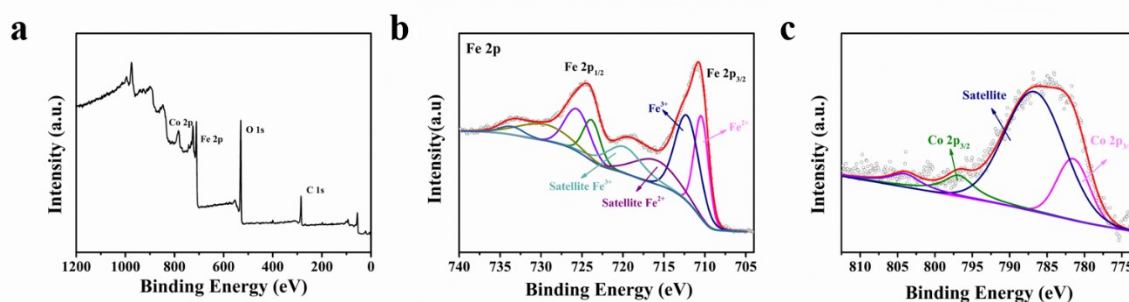

**Figure S1.** XPS spectra of the  $\text{Fe}_3\text{O}_4@\text{MIL-101}(\text{Fe}, \text{Co})$  (a) full-range scan of the samples, (b) Fe 2p (c) Co 2p.

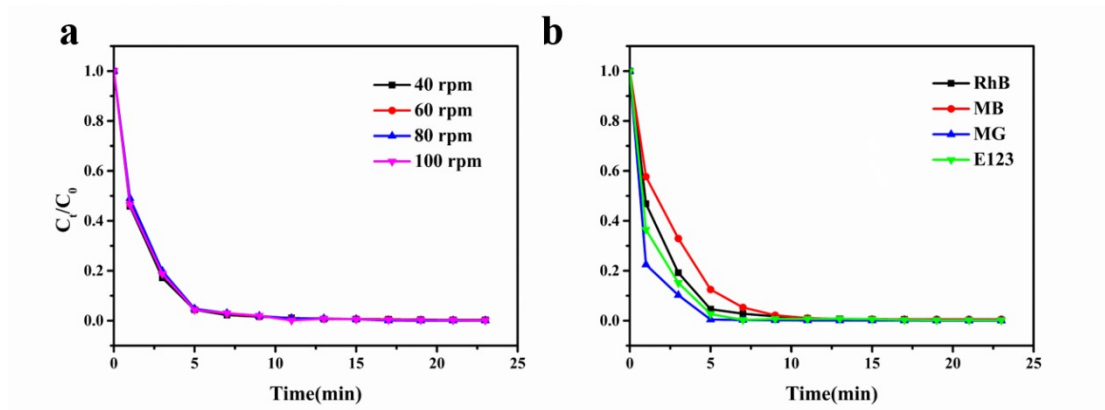

**Figure S2.** Effect of different stirring rate on RhB degradation (a). Degradation of different dyes by  $\text{Fe}_3\text{O}_4@\text{MIL-101}(\text{Fe, Co})$  (b). Concentration: [dyes] = 10 mg/L, [PMS] = 0.4 g/L, [catalyst] = 0.2 g/L, Volume: 20 mL; Temperature: 25 ; Initial solution pH: 7.0.

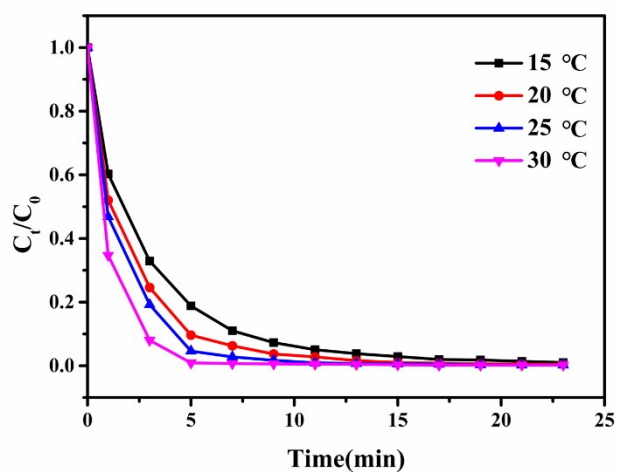

**Figure S3.** Effect of different temperature on RhB degradation (a). Degradation of different dyes by  $\text{Fe}_3\text{O}_4@\text{MIL-101}(\text{Fe, Co})$  (b). Concentration: [RhB], [PMS] = 0.4 g/L [catalyst] = 0.2 g/L, Volume: 20 mL; Initial solution pH: 7.0.

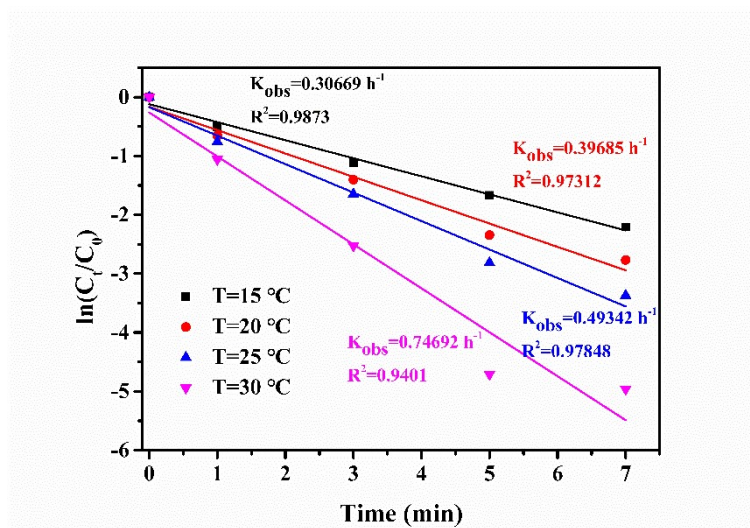

Figure S4. The kinetics simulation results of the degradation reaction at different temperature.

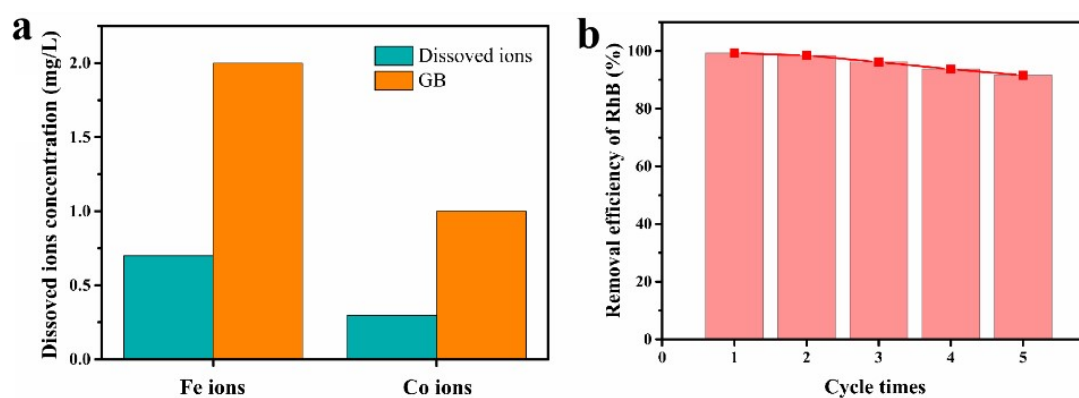

Figure S5. Dissolution of Fe and Co ions in  $Fe_3O_4@MIL-101(Fe, Co)$  within 15 min after reaction (a). Degradation efficiency of RhB in five recycling of  $Fe_3O_4@MIL-101(Fe, Co)$  (b). Concentration: [RhB] = 10 mg/L, [PMS] = 0.4 g/L, [catalyst] = 0.2 g/L, Volume: 20 mL; Temperature: 25 °C; Initial solution pH: 7.0.

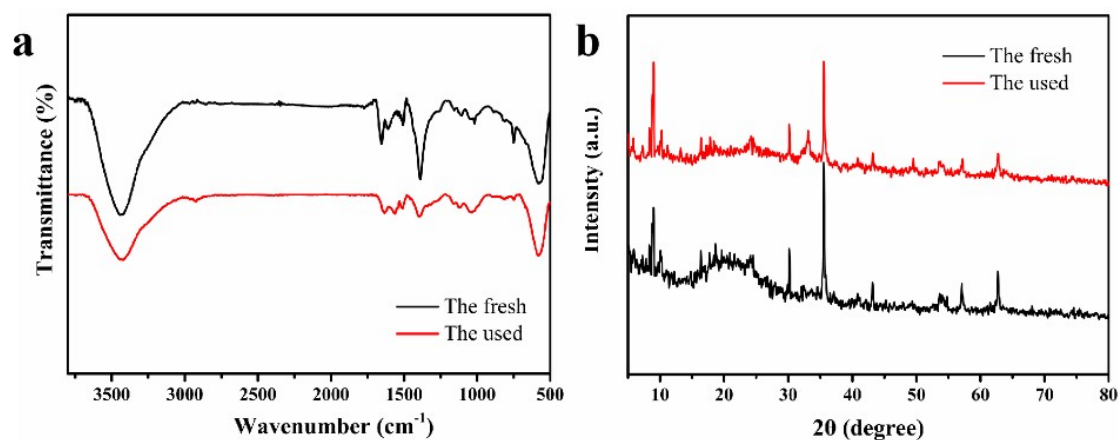

Figure S6. XRD (a) and FT-IR (b) patterns of  $Fe_3O_4@MIL-101(Fe, Co)$  before and after Fenton-like reaction.

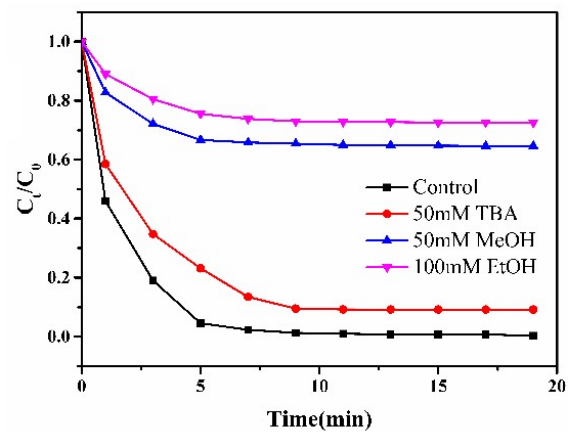

**Figure S7.** Quenching experiment on RhB degradation. Concentration: [RhB] = 10 mg/L, [PMS] = 0.4 g/L, [catalyst] = 0.2 g/L, Volume: 20 mL; Temperature: 25 °C; Initial solution pH: 7.0.
